# Supplementary material
Source: HighWire-hosted journal article supplement (http://www.cmaj.ca/highwire/filestream/58103/field_highwire_adjunct_files/0/image-bhat-1-at.pdf)

Appendix 1: Balloon gastrostomy tube with inflated balloon and external bolster. The external bolster is kept 1 to 2 cm away from the abdominal wall to prevent tube migration. The Y port connects to the feeding tube and to a syringe used for balloon inflation.

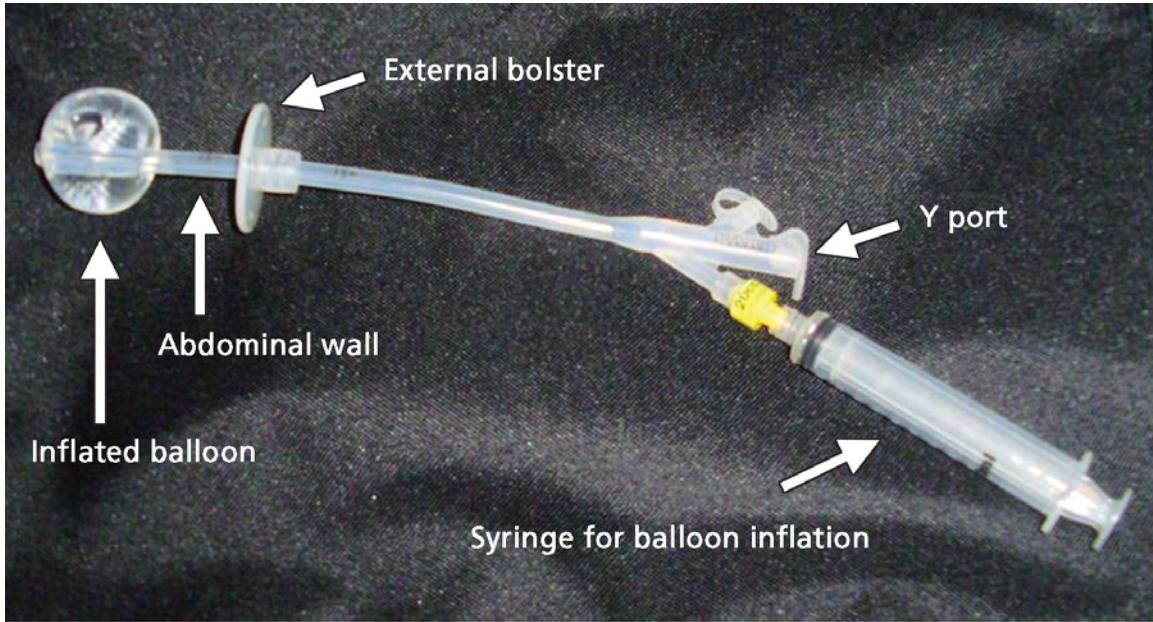

Supplement: image-bhat-1-at.pdf [file image-bhat-1-at.pdf]
